# Supplementary material
Source: publisher figshare collection journal article supplement (https://acs.figshare.com/ndownloader/files/17077580)
Supplement: Supplementary file 1 [file 17077580]

# Supporting Information:

## Wearable Sweat Band for Noninvasive Levodopa Monitoring

*Li-Chia Tai,<sup>†,‡,§</sup> Tiffany S. Liaw,<sup>†,‡,§</sup> Yuanjing Lin,<sup>†,‡,§,||</sup> Hnin Y. Y. Nyein,<sup>†,‡,§</sup> Mallika  
Bariya,<sup>†,‡,§</sup> Wenbo Ji,<sup>†,‡,§</sup> Mark Hettick,<sup>†,‡,§</sup> Chunsong Zhao,<sup>†,‡,§</sup> Jiangqi Zhao,<sup>†,‡,§</sup> Lei  
Hou,<sup>†,‡,§</sup> Zhen Yuan,<sup>†,‡,§</sup> Zhiyong Fan,<sup>||</sup> and Ali Javey<sup>\*†,‡,§</sup>*

<sup>†</sup>Department of Electrical Engineering and Computer Sciences, University of California,  
Berkeley, California 94720, USA.

<sup>‡</sup>Berkeley Sensor and Actuator Center, University of California, Berkeley, California  
94720, USA.

<sup>§</sup>Materials Sciences Division, Lawrence Berkeley National Laboratory, Berkeley,  
California 94720, USA.

<sup>||</sup>Department of Electronic and Computer Engineering, Hong Kong University of Science  
and Technology, Clear Water Bay, Kowloon, Hong Kong SAR, China.

\*Correspondence and requests for materials should be addressed to A. J. (email:  
ajavey@berkeley.edu).

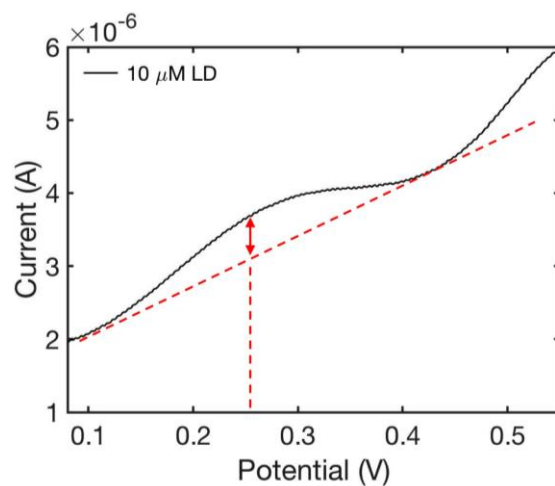

**Figure S1.** Method of determining peak potential. A tangent line is drawn at the proximity of the CV peak, and the potential corresponding to the largest peak height can be traced via the vertical dotted line.

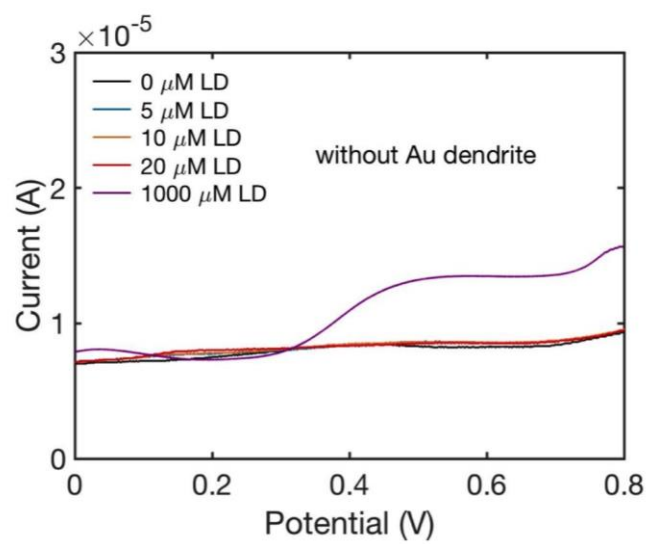

**Figure S2.** CV of levodopa dissolved in PBS tested with bare Au working electrode, commercial Ag/AgCl reference electrode, and Pt counter electrode.

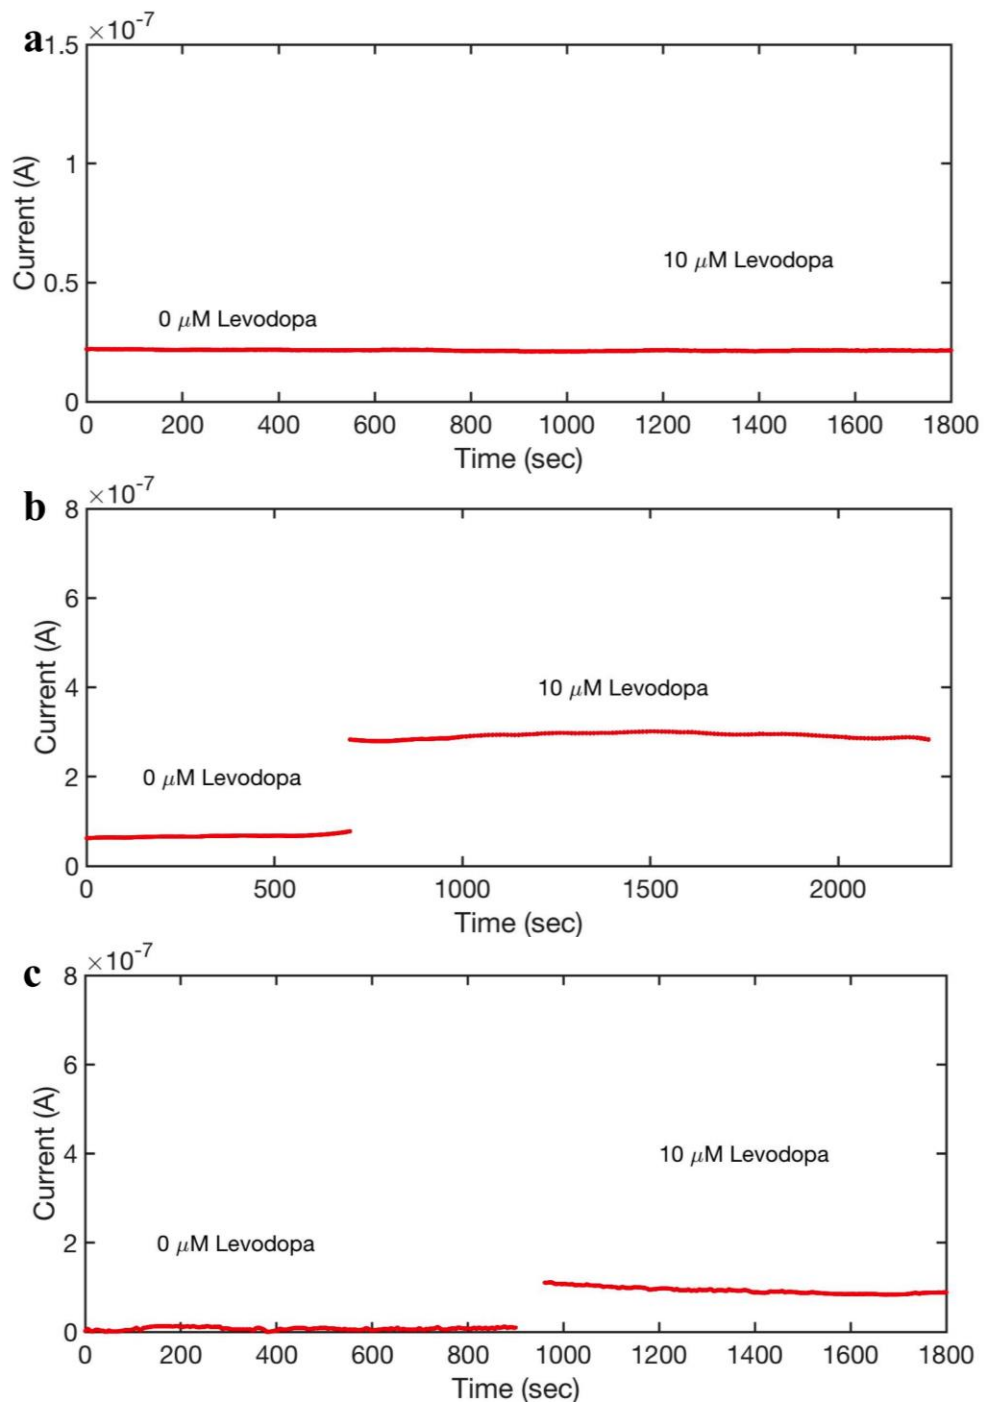

**Figure S3.** Long-term amperometric test for functionalized working electrode. Au dendrite deposition time of (a) 60 seconds, (b) 120 seconds, and (c) 240 seconds.

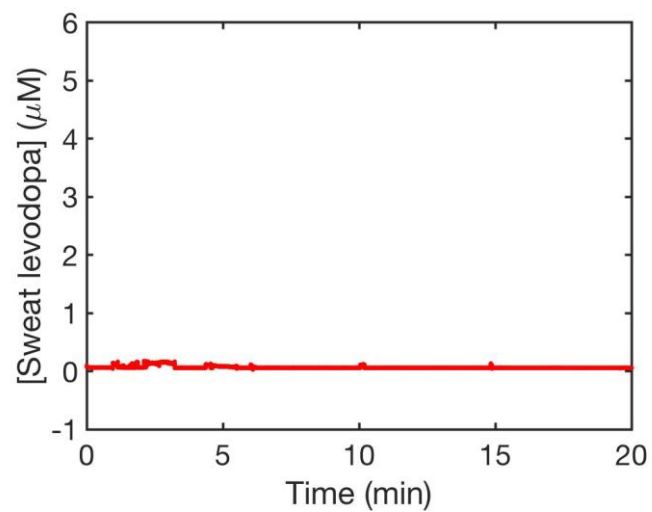

**Figure S4.** Levodopa sensor response with iontophoresis-induced sweat without fava beans consumption. The sweat levodopa concentration is almost zero compared to the case with fava beans consumption.
